# Supplementary material for: Au–Pd bimetallic nanoparticles anchored on α-Fe2O3 nonenzymatic hybrid nanoelectrocatalyst for simultaneous electrochemical detection of dopamine and uric acid in the presence of ascorbic acid
Source: Royal Society of Chemistry journal article supplement (doi:10.1039/c6tb00501b), 2016-01-01
Supplement: c6tb00501b1.pdf [file c6tb00501b1.pdf]

**Supplementary Information**

**Au-Pd bimetallic nanoparticles anchored on  $\alpha$ -Fe<sub>2</sub>O<sub>3</sub> nonenzymatic hybrid  
nanoelectrocatalyst for simultaneous electrochemical detection of dopamine and uric acid  
in the presence of ascorbic acid**

C.Sumathi, C. Venkateswara Raju, P.Muthukumaran, J.Wilson, G.Ravi

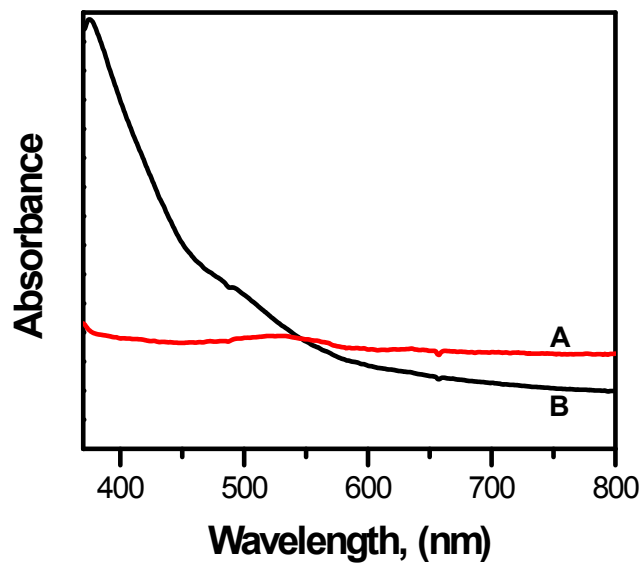

Figure S1. UV visible spectra of (A)  $\alpha$ -Fe<sub>2</sub>O<sub>3</sub> (B)  $\alpha$ -Fe<sub>2</sub>O<sub>3</sub>/Au-Pd hybrid nanostructure

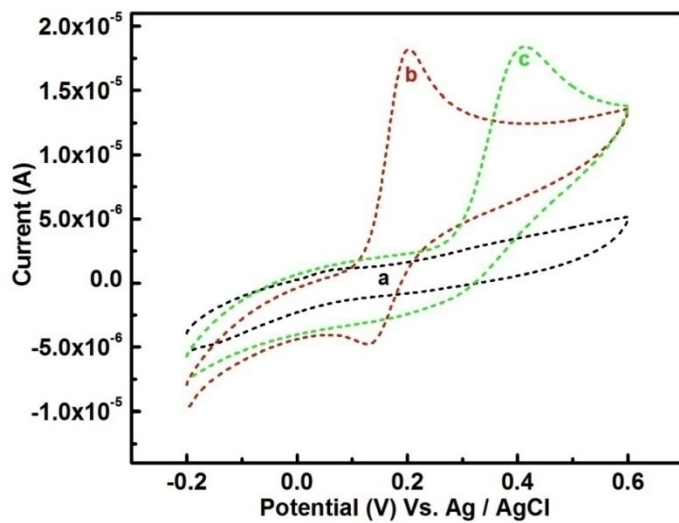

Figure S2. 1mM of (a) Ascorbic acid, (b) Dopamine (c) Uric acid in PBS (pH 7) for the  $\alpha$ -Fe<sub>2</sub>O<sub>3</sub>/Au-Pd hybrid modified electrode

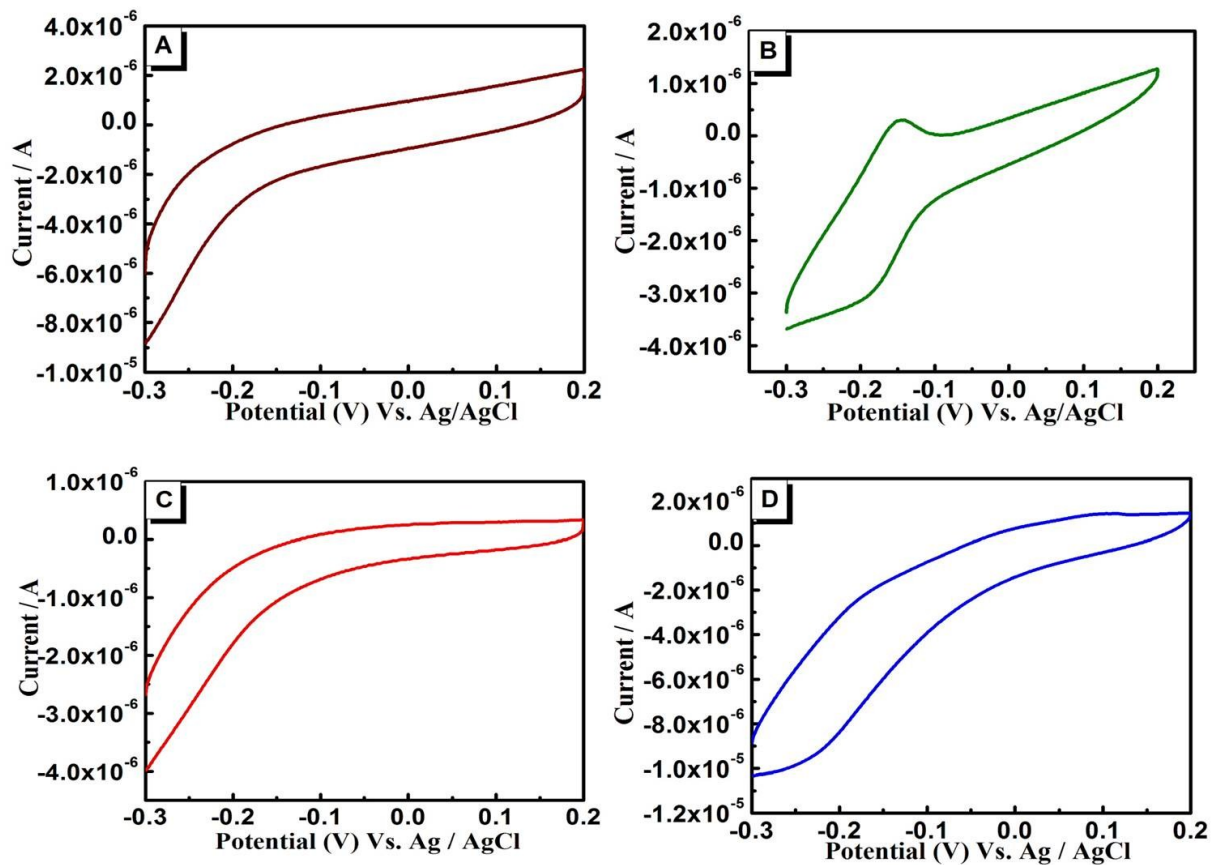

Figure S3. CVs obtained for (1mM) PBS at a  $50 \text{ mV s}^{-1}$  with addition  $25 \mu\text{M}$  of Methylene blue at a (A) bare (B)  $\alpha\text{-Fe}_2\text{O}_3$  (C) Au-Pd (D)  $\alpha\text{-Fe}_2\text{O}_3/\text{Au-Pd}$  hybrid at a potential between -0.3 and 0.2 V (pH 7).

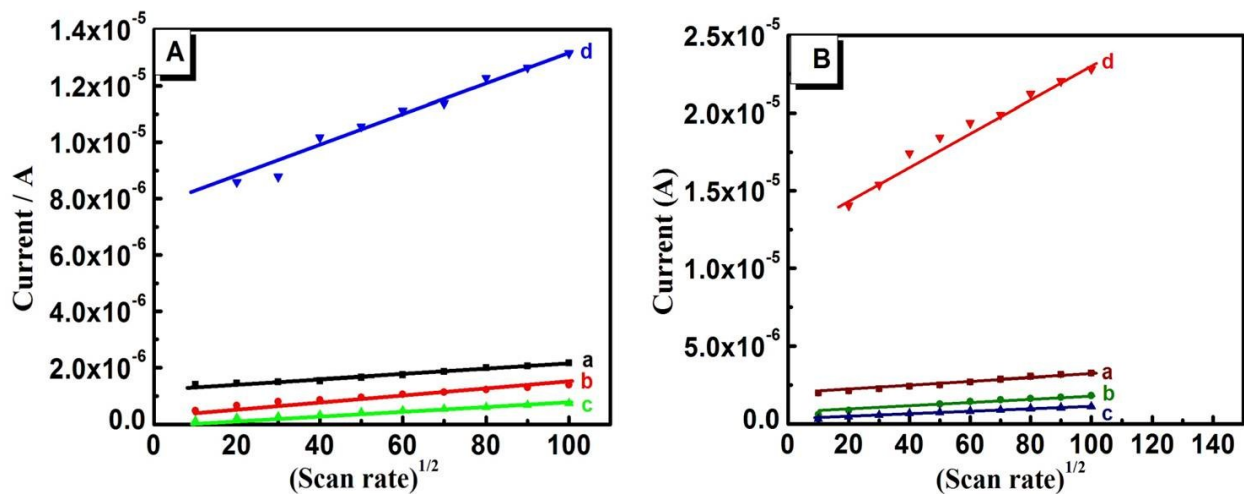

Figure S4. (A) CV studies recorded at different scan rate from (10 – 100  $\text{mVs}^{-1}$ ) (a) Bare GC (b)  $\alpha\text{-Fe}_2\text{O}_3$  (c) Au/ Pd (d)  $\alpha\text{-Fe}_2\text{O}_3$  /Au-Pd hybrid for dopamine. Fig (B) differ scan rate for (10 - 100  $\text{mV s}^{-1}$ ) (a) Bare GC (b)  $\alpha\text{-Fe}_2\text{O}_3$  (c) Au/Pd (d)  $\alpha\text{-Fe}_2\text{O}_3$  /Au-Pd hybrid for uric acid.

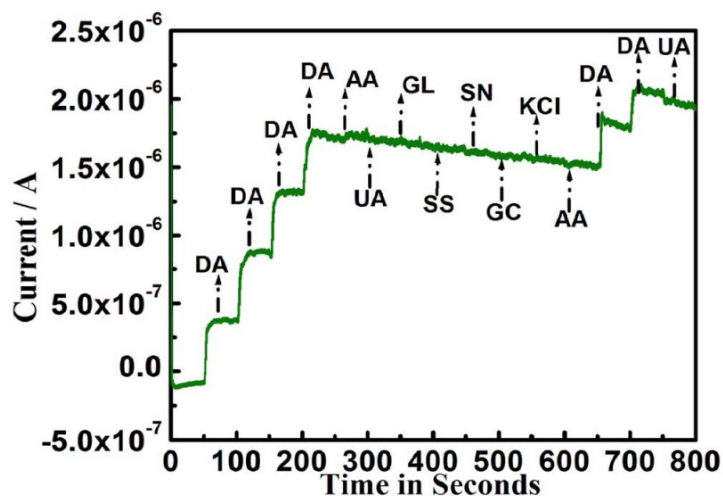

Figure S5. Amperometry ( Time Vs Current ) for modified  $\alpha\text{-Fe}_2\text{O}_3$  /Au-Pd hybrid GC for dopamine & uric acid of 50  $\mu\text{M}$  concentration while other interfering analytes of 5 mM concentration

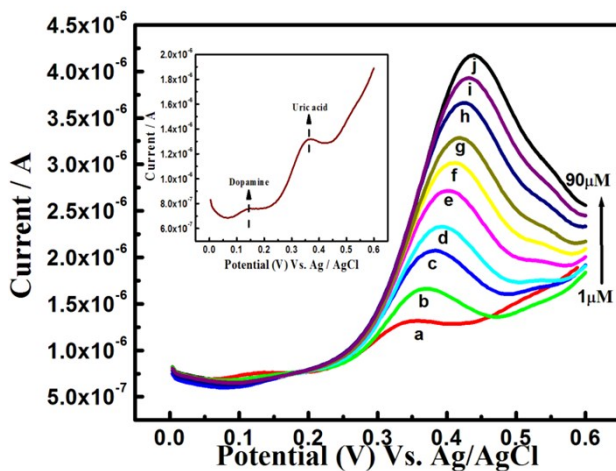

Figure S6. shows the response of  $\alpha\text{-Fe}_2\text{O}_3$  /Au-Pd hybrid GC at different concentration of urine sample 1 (a) 1  $\mu\text{M}$  (b) 3  $\mu\text{M}$ , (c) 5  $\mu\text{M}$ , (d) 6  $\mu\text{M}$ , (e) 10  $\mu\text{M}$ , (f) 20  $\mu\text{M}$ , (g) 40  $\mu\text{M}$ , (h) 60  $\mu\text{M}$ , (i) 70  $\mu\text{M}$  (j) 90  $\mu\text{M}$  in 0.1 M PBS containing pH 7.0.

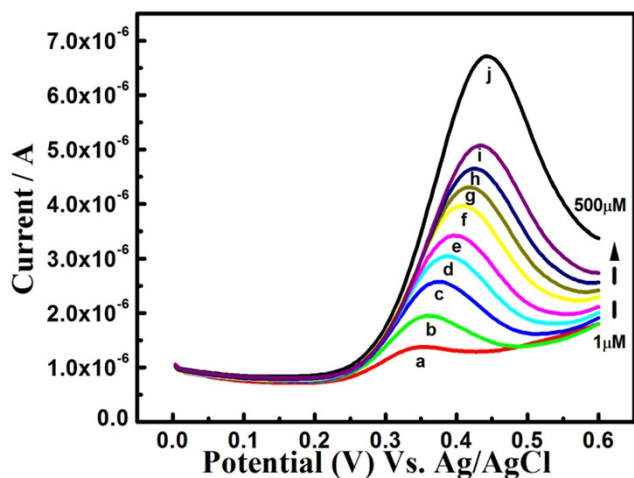

Figure S7. shows the response of  $\alpha\text{-Fe}_2\text{O}_3$  /Au-Pd hybrid GC at different concentration of urine sample 2 (a) 1  $\mu\text{M}$ , (b) 2  $\mu\text{M}$ , (c) 5  $\mu\text{M}$ , (d) 20  $\mu\text{M}$ , (e) 70  $\mu\text{M}$ , (f) 80  $\mu\text{M}$ , (g) 90  $\mu\text{M}$ , (h) 200  $\mu\text{M}$ , (i) 300  $\mu\text{M}$ , (j) 500  $\mu\text{M}$  in 0.1 M PBS containing pH 7.0

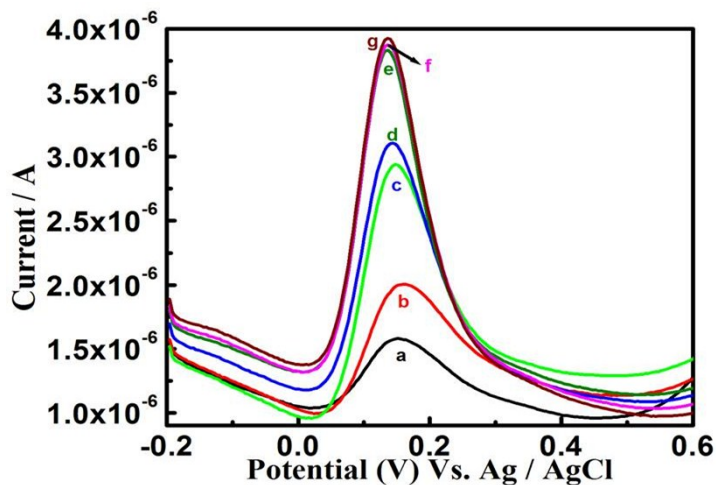

Figure S8. shows the response of  $\alpha$ -Fe<sub>2</sub>O<sub>3</sub> /Au-Pd hybrid GC at different concentration of fresh human blood serum (a) 300 nM (b) 1 $\mu$ M (c) 4  $\mu$ M (d) 5  $\mu$ M (e) 10  $\mu$ M (f) 25  $\mu$ M (g) 50  $\mu$ M containing 0.1M of PBS ( pH 7.0).

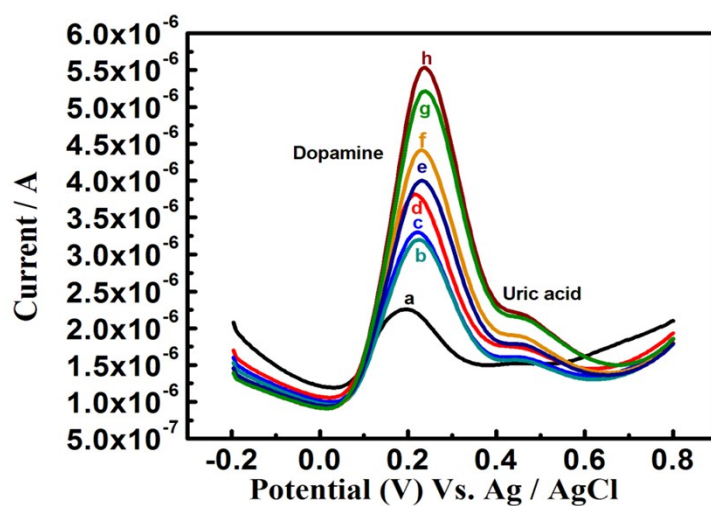

Figure S9. shows the response of  $\alpha$ -Fe<sub>2</sub>O<sub>3</sub> /Au-Pd hybrid GC at different concentration of dopamine hydrochloride injection (a) 450 nM, (b) 4  $\mu$ M, (c) 6 $\mu$ M, (d)10  $\mu$ M, (e) 15  $\mu$ M, (f) 25  $\mu$ M, (g) 50  $\mu$ M, (h) 60  $\mu$ M containing 0.1M of PBS ( pH 7.0)

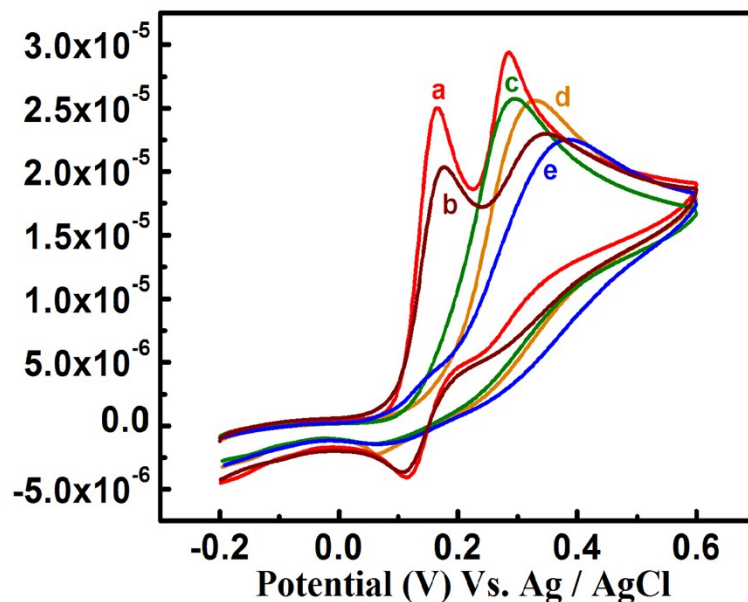

Figure S 10. shows different ratio for Au/Pd bimetal (a)1:1 (b) 1:0.5 (c) 0.5:1 (d) 1:0.25 (e) 0.25:1 ratio containing 600  $\mu\text{M}$  of dopamine & uric acid in 0.1 M of PBS( pH 7.0)

**Table S1 - Voltammetric DA,UA in presence of AA recovery tests performed in Human Urine, Serum and Dopamine hydrochloride injection with  $\alpha - \text{Fe}_2\text{O}_3 / \text{Au}@ \text{Pd}$  , pH = 7.0**

| Sample                           | Added [DA, UA] $\mu\text{M}$ | Obtained [DA, UA] $\mu\text{M}$ | Recovery (%) [DA, UA] |
|----------------------------------|------------------------------|---------------------------------|-----------------------|
| Urine 1                          | — , 5.00                     | — , 5.06                        | — , 101.2             |
| Urine 2                          | — , 5.00                     | — , 5.30                        | — , 106.0             |
| Serum                            | 4.50, —                      | 4.29, —                         | 95.3 , —              |
| Dopamine hydrochloride injection | 4.00,1.00                    | 3.70,1.03                       | 92.5,103.0            |

**Table S2 Summary of various nanomaterial-based electrochemical sensors for DA and UA in presence of Ascorbic acid**

|   |                                                                                                         | DA                                | UA                                  | DA            | UA           |   |
|---|---------------------------------------------------------------------------------------------------------|-----------------------------------|-------------------------------------|---------------|--------------|---|
| 1 | Pretreated pencil graphite                                                                              | 0.15-15 $\mu$ M                   | 0.3-150 $\mu$ M                     | 0.033 $\mu$ M | 0.12 $\mu$ M | 1 |
| 2 | Poly(acrylic acid)-multiwalled carbon-nanotube composite-covered glassy-carbon                          | 40nM-3 $\mu$ M                    | 0.3 $\mu$ M-10 $\mu$ M              | 20nM          | 110nM        | 2 |
| 3 | Multi-walled carbon nanotube-chitosan/poly(amidoamine)/DNA nanocomposite modified gold electrode        | 0.2-10 $\mu$ M & 10-100 $\mu$ M   | 0.5-100 $\mu$ M                     | 0.03 $\mu$ M  | 0.07 $\mu$ M | 3 |
| 4 | Pt/reduced graphene oxide(Pt/RGO) modified glassy carbon electrode                                      | 10-170 $\mu$ M                    | 10-130 $\mu$ M                      | 0.25 $\mu$ M  | 0.45 $\mu$ M | 4 |
| 5 | Gold nanoparticle/choline (GNP/Ch) coated glassy carbon electrode                                       | -                                 | -                                   | -             | -            | 5 |
| 6 | 2,2'-azino-bis(3-ethylbenzthiazoline-6-sulfonic acid)(ABTS)-immobilized carbon nanotube (CNT) electrode | 0.90-10 $\mu$ M & 1.87-20 $\mu$ M | 2.16-240 $\mu$ M & 3.07-400 $\mu$ M | -             | -            | 6 |
| 7 | Electrochemically preanodized clay-modified electrodes                                                  | 0-6 $\mu$ M                       | 0.5-10 & 10-100 $\mu$ M             | 2.7nM         | 0.2 $\mu$ M  | 7 |
| 8 | DNA/Poly( <i>p</i> -aminobenzenesulfonic acid) composite bi-layer modified glassy                       | 0.19-13 $\mu$ M                   | 0.4-23 $\mu$ M                      | 88 nM         | 0.19 $\mu$ M | 8 |



|    |                                                                                                    |                                                                |                                                                |                                        |                                        |    |
|----|----------------------------------------------------------------------------------------------------|----------------------------------------------------------------|----------------------------------------------------------------|----------------------------------------|----------------------------------------|----|
|    | carbon electrode                                                                                   |                                                                |                                                                |                                        |                                        |    |
| 9  | RNA modified electrode                                                                             | 0.37 to 36 $\mu\text{M}$                                       | 0.74 to 73 $\mu\text{M}$                                       | 0.2 $\mu\text{M}$                      | 0.36 $\mu\text{M}$                     | 9  |
| 10 | poly(orthanilic acid)–multiwalled carbon nanotubes composite film-modified glassy carbon electrode | 9–48 $\mu\text{M}$                                             | 6–55 $\mu\text{M}$                                             | 0.21 $\mu\text{M}$                     | 0.44 $\mu\text{M}$                     | 10 |
| 11 | multi-walled carbon nanotubes with methylene blue composite film-modified electrode                | 0.4–10.0 $\mu\text{M}$                                         | 2.0–20.0 and 20.0–200.0 $\mu\text{M}$                          | 0.2 $\mu\text{M}$                      | 1.0 $\mu\text{M}$                      | 11 |
| 12 | Glassy carbon electrode modified with poly(dibromofluorescein)                                     | 0.2 to 200 $\mu\text{M L}^{-1}$                                | 1.0 to 250 $\mu\text{M L}^{-1}$                                | 0.03 $\mu\text{M L}^{-1}$              | 0.2 $\mu\text{M L}^{-1}$               | 12 |
| 13 | functionalized ordered mesoporous carbon/ionic liquid gel modified electrode                       | 0.1 to 500 $\mu\text{M}$                                       | 0.1 to 100 $\mu\text{M}$                                       | 4.1nM                                  | 2.5 nM                                 | 13 |
| 14 | Ionic Liquid Functionalized Graphene-Based electrode                                               | 1–400 $\mu\text{M}$                                            | 1–600 $\mu\text{M}$                                            | 0.679 $\mu\text{M}$                    | 0.323 $\mu\text{M}$                    | 14 |
| 15 | Indole-3-Carboxaldehyde Modified Glassy Carbon Electrode                                           | 10 $\mu\text{M}$ -100 $\mu\text{M}$                            | 10 $\mu\text{M}$ -100 $\mu\text{M}$                            | 1.70 $\mu\text{M}$                     | 4.99 $\mu\text{M}$                     | 15 |
| 16 | DNA/Pt Nanocluster Modified Electrode                                                              | $1.1 \times 10^{-7}$ to $3.8 \times 10^{-5}$ M $\text{L}^{-1}$ | $3.0 \times 10^{-7}$ to $5.7 \times 10^{-5}$ M $\text{L}^{-1}$ | $3.6 \times 10^{-8}$ M $\text{L}^{-1}$ | $1.0 \times 10^{-7}$ M $\text{L}^{-1}$ | 16 |
|    |                                                                                                    |                                                                |                                                                |                                        |                                        |    |

## References:

- 1 Esmaeel, A.; Mir, R.; Majidi, A.; Saadatirad, S.; Mahdi, G.; Ali Mohammad, A. Simultaneous determination of dopamine and uric acid in biological samples on the pretreated pencil graphite electrode. *Electrochimica Acta*, **2013**, *91*, 36–42.
- 2 Aihua, L.; Itaru, Honma.; Haoshen, Z. Simultaneous voltammetric detection of dopamine and uric acid at their physiological level in the presence of ascorbic acid using poly (acrylic acid) – multiwalled carbon – nanotube composite – covered glassy – carbon electrode. *Biosensors and Bioelectronics*, **2007**, *23*, 74–80.
- 3 Xianggang, L.; Yinghua, P.; Xiangjin, Qu.; Shiyun, Ai.; Ruixia, Han.; Xiangbin, Zhu. Multi-walled carbon nanotube-chitosan/poly(amidoamine)/DNA nanocomposite modified gold electrode for determination of dopamine and uric acid under coexistence of ascorbic acid. *Journal of Electroanalytical Chemistry*, **2011**, *654*, 72–78.
- 4 Tian-Qi, Xu.; Qian-Li, Zhang.; Jie-Ning, Z.; Zhang-Ying, L.; Jie, W.; Ai-Jun, W. Simultaneous determination of dopamine and uric acid in the presence of ascorbic acid using Pt nanoparticles supported on reduced graphene oxide. *Electrochimica Acta*, **2014**, *115*, 109–115.
- 5 Po, W.; Yongxin, Li.; Xue, H.; Lun, W. Fabrication of layer-by-layer modified multilayer films containing choline and gold nanoparticles and its sensing application for electrochemical determination of dopamine and uric acid. *Talanta*, **2007**, *73*, 431–437.
- 6 Yi-Kai, C.; Ming-Chang, Y. An 2,2'-azino-bis(3-ethylbenzthiazoline-6-sulfonic acid)-immobilized electrode for the simultaneous detection of dopamine and uric acid in the presence of ascorbic acid. *Bioelectrochemistry*, **2013**, *91*, 44–51.
- 7 Jyh-Myng, Z.; Ping-Jyh, Chen. A Selective Voltammetric Method for Uric Acid and Dopamine Detection Using Clay-Modified Electrodes. *Analytical chemistry*, **1997**, *69*, 5087–5093.
- 8 Xiangqin, Lin.; Guangfeng, K.; Liping, Lu. DNA/Poly(*p*-aminobenzenesulfonic acid) composite

- bi-layer modified glassy carbon electrode for determination of dopamine and uric acid under coexistence of ascorbic acid . *Bioelectrochemistry*, **2007**, *70*, 235–244.
- 9 Guangfeng, K.; Xiangqin, L. RNA Modified Electrodes for Simultaneous Determination of Dopamine and Uric Acid in the Presence of High Amounts of Ascorbic Acid. *Electroanalysis*, **2006**, *18*, 2458–2466.
  - 10 Lei, Z.; Zhige, S.; Qihua, L. Fabrication of poly(orthanilic acid)–multiwalled carbon nanotubes composite film-modified glassy carbon electrode and its use for the simultaneous determination of uric acid and dopamine in the presence of ascorbic acid. *Journal of Solid State Electrochemistry*, **2011**, *15*, 801-809.
  - 11 Suling, Y.; Gang, Li.; Ran, Y.; Miaomiao, X.; Lingbo, Qu. Simultaneous voltammetric detection of dopamine and uric acid in the presence of high concentration of ascorbic acid using multi-walled carbon nanotubes with methylene blue composite film-modified electrode. *Journal of Solid State Electrochemistry*, **2011**, *15*, 1909-1918.
  - 12 Yan, W.; Yan, X. Glassy carbon electrode modified with poly(dibromofluorescein) for the selective determination of dopamine and uric acid in the presence of ascorbic acid. *Microchimica Acta*, **2012**, *178*, 123-130.
  - 13 Junping, D.; Yanyan, Hu.; Shenmin, Z.; Jiaqiang, Xu.; Yinjuan, Xu. A highly selective and sensitive dopamine and uric acid biosensor fabricated with functionalized ordered mesoporous carbon and hydrophobic ionic liquid. *Analytical and Bioanalytical Chemistry*, **2010**, *396*, 1755-1762.
  - 14 Chunfeng, W.; Panpan, Xu.; Kelei, Z. Ionic Liquid Functionalized Graphene-Based Electrochemical Biosensor for Simultaneous Determination of Dopamine and Uric Acid in the Presence of Ascorbic Acid. *Electroanalysis*, **2013**, *26*, 191-198.
  - 15 Deletioğlu, D.; Hasdemir, E.; Solak, A. Simultaneous Determination of Dopamine and Uric Acid in the Presence of Ascorbic Acid at the Indole-3-Carboxaldehyde Modified Glassy Carbon Electrode. *Current Analytical Chemistry*, **2010**, *6*, 203-208.
  - 16 Yu, Z.; Xiang-Qin, L. Simultaneous Detection of Dopamine and Uric Acid under Coexistence of Ascorbic Acid with DNA/Pt Nanocluster Modified Electrode Chinese. *Journal of Chemistry*, **2008**, *26*, 898–904
